# Supplementary material
Source: Royal Society of Chemistry journal article supplement (https://www.rsc.org/suppdata/dt/1999/3419/904592i.doc)
Supplement: Supplementary file 1 [file 904592i.doc]

**Table 5** E lectrochemical data for *P*-ferrocenyl compounds.

|  |  |  |  |  |
| --- | --- | --- | --- | --- |
|  |  |  |  |  |
| X | Y | *E*f (Volts vs SSCE) | E (mV) | Compound |
| S | S | 0.54b |  |  |
| S | S | 0.71a |  |  |
| S | S | 0.80a * |  |  |
|  |  |  |  |  |
| C | S | 0.67 |  |  |
| C | S | 0.67 |  |  |
| C | S | 0.65a |  |  |
| C | S | 0.66 |  |  |
| C | S | 0.66b |  |  |
| C | S | 0.69 |  |  |
|  |  |  |  |  |
| N | S | 0.66 |  |  |
| N | S | 0.77 | 70 |  |
| N | S | 0.74 | 64 |  |
| N | S | 0.78 | 90 |  |
| N | S | 0.78 | 66 |  |
| N | S | 0.75 | 88 |  |
| N | N | 0.63a |  |  |
| N | N | 0.74 |  |  |
| N | N | 0.72 |  |  |
| N | N | 0.56b |  |  |
| N | N | 0.53/0.87c |  |  |
|  |  |  |  |  |
| N | O | 0.72 | 118 |  |
| O | O | 0.81 |  |  |
| O | O | 0.80 |  |  |
|  |  |  |  |  |

a Redox couple is quasi-reversible showing slow electron transfer.b A small shoulder was seen as a prepeak on the reducing wave.c A second redox couple is seen, which is not reversible.

**Table 6.** Details of the crystal data and refinements

Compound **8(**MFDW19) **10** (MFDW23) **18**(MFDW14)

Formula C23H24N2P2S3Fe2O C27H25NP2S3Fe2  C22H21N2PSFe

Crystal system triclinic monoclinic monoclinic

Space group P-1 *P*21/*c* *P*21/*n*

Unit cell dimensions (Å) a 11.776(3) 7.347(2) 9.568(2)

b 12.172(2) 14.262(3) 12.6641(9)

c 9.949(1) 25.660(2) 16.383(2)

 106.28(1) - -

 108.82(1) 95.75(1) 92.24(1)

 80.96(2) - -

Volume(Å3) 1292 2575 1984

Z 2 4 4

Formula weight 614.3 633.3 432.2

**(calc) Mgm-3 1.58 1.572 1.45

Absorption Coefficient/mm-1 12.6 12.15 7.9

F(000) 628 1296 896

Reflections 4066 4198 3319

Observed Refl. (I>2.0(I)) 2599 2100(I>3.0(I)) 1832

Min/Max transm. 0.79/1.00 0.25/1.00 0.64/1.00

Final *R,R*w 0.042,0.039 0.060,0.058 0.041,0.035

NOTE TO ED : The MFDW codes are local – we will remove them at the proof stage.

**Figure 1** Thiadiazaphosphorines with one NMR environment for the ring carbon and dimethylamino groups.


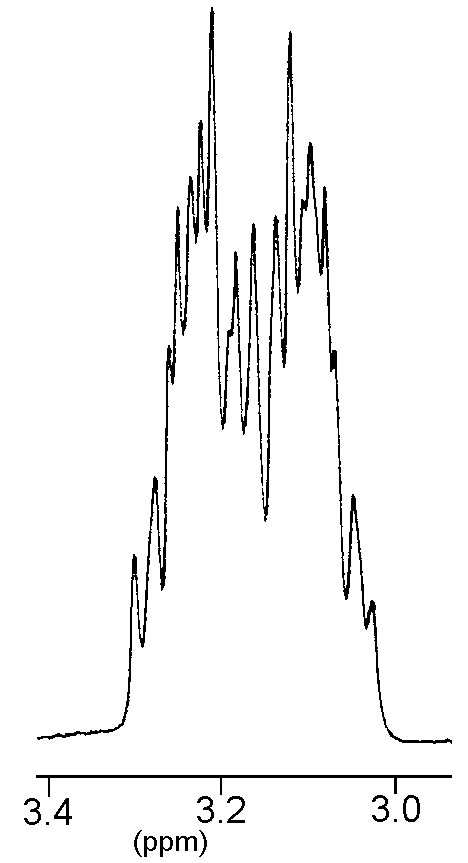
**Figure 2** Part of the 1H spectrum of **6** with and withoutdouble irradiation at 1.5 ppm.

uniradiated With double irradiation

**Figure 3** The thiazaphosphetane sulfide intermediate.

**Figure 4** Possible isomers for the formula Fc2P2(NMe2)(NCS)OS2 (**8**).

**Figure 8** 31P-{1H} NMR spectrum of **19**


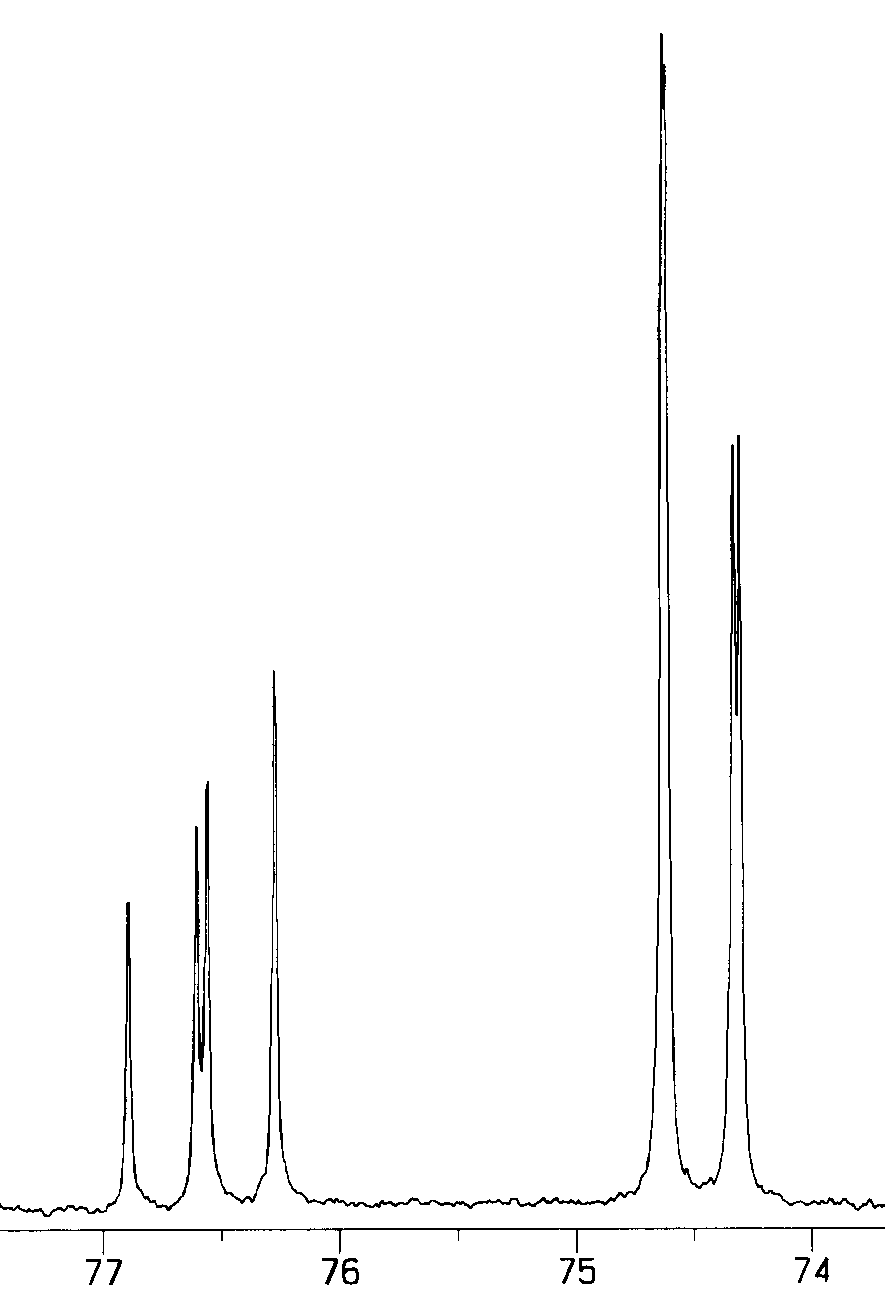


**Figure 9** Two conformations possible for **19**.
